# Supplementary material for: A tumor microenvironment dual responsive contrast agent for contrary contrast-magnetic resonance imaging and specific chemotherapy of tumors
Source: Royal Society of Chemistry journal article supplement (doi:10.1039/d1nh00632k), 2022-01-01
Supplement: d1nh00632k1.pdf [file d1nh00632k1.pdf]

## Electronic Supporting Information

1

2

3 **A tumor microenvironment dual responsive contrast agent for contrary contrast-**  
4 **magnetic resonance imaging and specific chemotherapy of tumors**

5

6 Yudie Lu,<sup>†</sup> Jie Feng,<sup>†</sup> Zhiyu Liang,<sup>b</sup> Xuanyi Lu,<sup>a</sup> Shuai Guo,<sup>a</sup> Lin Huang,<sup>a</sup> Wei Xiong,<sup>b</sup> Sijin  
7 Chen,<sup>b</sup> Huimin Zhou,<sup>c</sup> Xuehua Ma,<sup>d</sup> Yikai Xu,<sup>b</sup> Xiaozhong Qiu,<sup>c</sup> Aiguo Wu,<sup>d</sup> Xiaoyuan  
8 Chen,<sup>e,f,g</sup> Zheyu Shen<sup>a,b,c\*</sup>

9 <sup>a</sup> School of Biomedical Engineering, Southern Medical University, 1023 Shatai South Road,  
10 Guangzhou, Guangdong 510515, China

11 <sup>b</sup> Medical Imaging Center, Nanfang Hospital, Southern Medical University, 1023 Shatai South  
12 Road, Guangzhou, Guangdong 510515, China

13 <sup>c</sup> Guangdong Provincial Key Laboratory of Construction and Detection in Tissue Engineering,  
14 School of Basic Medical Sciences, Southern Medical University, 1023 Shatai South Road,  
15 Guangzhou, Guangdong 510515, China

16 <sup>d</sup> Cixi Institute of Biomedical Engineering, CAS Key Laboratory of Magnetic Materials and  
17 Devices, Ningbo Institute of Materials Technology and Engineering, Chinese Academy of  
18 Sciences, 1219 Zhongguan West Road, Ningbo, Zhejiang 315201, China

19 <sup>e</sup> Departments of Diagnostic Radiology, Surgery, Chemical and Biomolecular Engineering, and  
20 Biomedical Engineering, Yong Loo Lin School of Medicine and Faculty of Engineering,  
21 National University of Singapore, Singapore, 119074, Singapore

22 <sup>f</sup> Clinical Imaging Research Centre, Centre for Translational Medicine, Yong Loo Lin School  
23 of Medicine, National University of Singapore, Singapore 117599, Singapore

24 <sup>g</sup> Nanomedicine Translational Research Program, NUS Center for Nanomedicine, Yong Loo  
25 Lin School of Medicine, National University of Singapore, Singapore 117597, Singapore

26

### 27 **Corresponding Author**

28 \* E-mail address: sz@smu.edu.cn (Z. Shen).

29

### 30 **Author Contributions**

31 <sup>†</sup> Y.L. and J.F. contributed equally to this work.

## 32 **Experimental Methods**

33 *Synthesis of FeGdNP Nanoparticles:* 160 mL of PAA (Mw = 1800) solution (4.0 mg/mL)  
34 was first purged with nitrogen ( $\geq 1.0$  h) to remove oxygen. The polymer solution was then  
35 heated to reflux (100 °C). After that, 3.2 mL of mixture of iron precursors (500 mM FeCl<sub>3</sub> plus  
36 250 mM FeSO<sub>4</sub>) was quickly injected into the heated polymer solution, followed by addition  
37 of 48 mL of ammonia solution (28 %). The reaction was kept at 100 °C under magnetic stirring.  
38 After 30 min, 3.2 mL of Gd(NO<sub>3</sub>)<sub>3</sub> (500 mM) and 24 mL of ammonia solution (28 %) were  
39 added into the reaction system. The reaction was continued for 60 min under magnetic stirring  
40 at 100 °C to obtain the FeGdNP. Finally, the solutions were cooled down to room temperature.  
41 The obtained FeGdNP nanoparticles were purified by membrane dialysis (Mw cut-off 6-8 kDa)  
42 against Milli-Q water for 5 days with a daily change of the water. The purified FeGdNP was  
43 concentrated by centrifugal ultrafiltration (Millipore, molecular size cutoff of 10 kDa). The Fe  
44 and Gd concentrations of the solutions were measured by inductively coupled plasma optical  
45 emission spectrometry (ICP-OES).

46 *Synthesis of mPEG-FBA:* Methoxy poly(ethylene glycol) (mPEG, Mw = 2000) was dissolved  
47 in dichloromethane with a concentration of 50 mg/mL. To 160 mL of the mPEG solution (8.0  
48 g, 4.0 mmol), 4-Formylbenzoic acid (FBA, 1.8 g, 12 mmol), dimethylformamide (DMF, 20  
49 mL), Dicyclohexylcarbodiimide (DCC, 2.48 g, 12 mmol), and 4-(Dimethylamino)pyridine  
50 (DMAP, 732 mg, 6.0 mmol) were added. The solution was stirred at room temperature for 24  
51 h, and then filtered thrice to discard the precipitate dicyclohexylurea (DCU). After that,  
52 dichloromethane of the filtrate was evaporated via N<sub>2</sub> bubbling, and the product was dispersed  
53 in MilliQ water (50 mL). The resulting mPEG-FBA was collected by freeze-drying. The  
54 obtained white powder of mPEG-FBA was stored at room temperature for further use.

55 *Influence of Solvents on the Reaction between FBA and CA:* 0.3 mL of cystamine  
56 dihydrochloride (CA) in methanol (20 mg/mL) was mixed with 37.1  $\mu$ L of triethylamine (TEA).  
57 After that, 0.80 mL of FBA (5.0 mg/mL in DMF, DMSO, THF, or ethanol) was added into the

58 above-mentioned mixture. After vortexing for 30 s, the mixtures were kept shaking in an  
59 incubator at 37 °C for 72 h. The obtained auto-fluorescent FBA-CA1-4 were measured by a  
60 fluorescence spectrophotometer.

61 *Synthesis of mPEG-FBA-CA*: 3.0 mL of cystamine dihydrochloride (CA) in methanol (20  
62 mg/mL) and 371  $\mu$ L of triethylamine (TEA) were respectively added into 8.0 mL of methanol.  
63 28.4 mL of mPEG-FBA in THF (20 mg/mL) were then mixed with the above-mentioned  
64 solution. After vortexing for 30 s, the mixture was kept shaking in an incubator at 45 °C for 72  
65 h. The obtained mPEG-FBA-CA was stored for further use.

66 *Synthesis of FeGdNP@mPEG*: 0.5 mL of FeGdNP nanoparticles in pure water (Gd = 22.2  
67 mM, Fe = 45.3 mM) was added into 3.624, 4.062, 4.281, 4.390, and 4.445 mL of DMF  
68 respectively. After that, 0.876, 0.438, 0.219, 0.110 and 0.055 mL of the above-obtained mPEG-  
69 FBA-CA (15.94 mg/mL) (mPEG-FBA-CA/Gd mass ratio = 8.0, 4.0, 2.0, 1.0 and 0.5) were  
70 respectively charged into the above-mentioned solutions with following addition of 10  $\mu$ L of  
71 N-(3-Dimethylaminopropyl)-N'-ethylcarbodiimide (EDC). Although the reaction between –  
72 COOH and –NH<sub>2</sub> is faster in mild acid solutions than in neutral or alkaline solutions, EDC (but  
73 not EDC.HCl) was used in this study because the benzoic imine in mPEG-FBA-CA is an acid  
74 labile linker. The total volume of the five reaction solutions was all 5.0 mL. The obtained  
75 FeGdNP@mPEG1-5 nanoparticles (in organic solvents, i.e., DMF, THF, and methanol) were  
76 then obtained after reaction under magnetic stirring at room temperature for 16 h.

77 *Synthesis of self-assembled FeGdNP@mPEG (SA-FeGdNP@mPEG)*: Milli-Q water was  
78 dropwise added into the above obtained FeGdNP@mPEG1-5 nanoparticles (volume ratio of  
79 water to nanoparticle solution = 9 : 1) under magnetic stirring. After that, the nanoparticle  
80 solutions were subjected to 3 days of dialysis (Mw cut-off 12-14 kDa) against Milli-Q water to  
81 remove the organic solvents (i.e., DMF, THF, and methanol) and un-conjugated organic  
82 molecules (i.e., mPEG-FBA, CA, TEA, mPEG-FBA-CA, and (mPEG-FBA)<sub>2</sub>-CA). After the

83 dialysis, the FeGdNP@mPEG1-5 nanoparticles were purified and self-assembled forming SA-  
84 FeGdNP@mPEG1-5.

85 *Synthesis of FeGdNP-DOX@mPEG and SA-FeGdNP-DOX@mPEG:* 0.5 mL of FeGdNP  
86 nanoparticles in pure water ( $Gd = 22.2 \text{ mM}$ ,  $Fe = 45.3 \text{ mM}$ ) was added into 1.269, 2.666, 3.364,  
87 3.713, and 3.887 mL of DMF, respectively. After that, 0.438 mL of the mPEG-FBA-CA (15.94  
88 mg/mL) (mPEG-FBA-CA/Gd mass ratio = 4.0) were charged into the above-mentioned  
89 solutions with following addition of EDC (10  $\mu\text{L}$ ). Five batches of FeGdNP@mPEG2  
90 nanoparticles were then obtained after reaction under magnetic stirring at room temperature for  
91 16 h. 1.0 mg/mL of DOX in DMF ranging from 2.793 to 0.175 mL (DOX/Gd mass ratio = 1.6,  
92 0.8, 0.4, 0.2, or 0.1) was then added into the obtained FeGdNP@mPEG2 nanoparticles. The  
93 total volume of the five reaction solutions was all 5.0 mL. After 4.0 h of reaction under magnetic  
94 stirring at room temperature, FeGdNP-DOX1-5@mPEG2 nanoparticles in organic solvents  
95 were obtained. The SA-FeGdNP-DOX1-5@mPEG2 were finally prepared utilizing similar  
96 procedures as the above-mentioned SA-FeGdNP@mPEG.

97 *Disassembling of the SA-FeGdNP-DOX2@mPEG2 nanoparticles:* 1.0 mL of SA-FeGdNP-  
98 DOX2@mPEG2 nanoparticles ( $C_{Gd} = 2.0 \text{ mM}$ ,  $C_{DOX} = 139 \mu\text{g/mL}$ ) were mixed with 1.0 mL  
99 of PBS (pH 7.4 or pH 6.8) with or without GSH (20 mM). The solutions were kept in a shaking  
100 incubator at 37 °C for 24 h, and then taken for TEM observation and MRI measurement.

101 *Release Behavior of DOX from SA-FeGdNP-DOX2@mPEG2:* The release behavior of DOX  
102 from SA-FeGdNP-DOX2@mPEG2 nanoparticles at pH 7.4 without GSH or at pH 6.8 with 10  
103 mM of GSH was determined by a fluorescence spectrophotometer. Typically, 1.0 mL of SA-  
104 FeGdNP-DOX2@mPEG2 nanoparticles ( $C_{Gd} = 2.0 \text{ mM}$ ,  $C_{DOX} = 139 \mu\text{g/mL}$ ) were mixed with  
105 1.0 mL of PBS (pH 7.4 or pH 6.8) with or without GSH (20 mM). The solutions were kept in a  
106 shaking incubator at 37 °C. At predetermined time intervals, 0.2 mL of the solution was taken  
107 and centrifuged at  $15,000 \times g$  for 20 min. The supernatants were then measured by a  
108 fluorescence spectrophotometer (Ex: 480 nm) and the fluorescence intensity at 593 nm was

109 converted into the DOX concentration using a calibration curve constructed with standard DOX  
110 solutions. The DOX release behavior at different conditions was monitored *via* plot of the  
111 cumulative released DOX content (*i.e.*, the mass percentage of the released DOX to the total  
112 amount of DOX in the nanoparticles) as a function of incubation time.

113 *Cell culture:* U-87 MG (human glioblastoma cell line), and HepG2 (human hepatoma cell  
114 line) cells were cultured in the DMEM medium supplemented with 10 wt% of fetal bovine  
115 serum (FBS), 100 units/mL of penicillin and 100 µg/mL of streptomycin. All of the cells were  
116 incubated at 37 °C in a humidified atmosphere containing 5 % of CO<sub>2</sub>.

117 *Cellular uptake by laser scanning confocal microscopy (LSCM):* Uptake of the nanoparticles  
118 by U-87 MG, or HepG2 cells was studied using LSCM. Typically, 0.5 mL of U-87 MG, or  
119 HepG2 cells in growth medium were seeded into each well of Falcon® Culture Slide (8 Well,  
120 Corning) at a density of  $5.0 \times 10^5$  cells/mL and allowed to adhere at 37 °C for 24 h. The growth  
121 medium was replaced with a fresh one (0.5 mL, without FBS) containing SA-FeGdNP-  
122 DOX2@mPEG2 nanoparticles ( $C_{Gd} = 140 \mu\text{M}$ ). Herein, before dispersing in DMEM medium  
123 (without FBS), the SA-FeGdNP-DOX2@mPEG2 nanoparticles were incubated at 37 °C for 24  
124 h at pH 7.4 without GSH, or at pH 6.8 with 10 mM of GSH. After further 2 h incubation, the  
125 cells were washed twice with PBS. The cells were then fixed with aqueous buffered zinc  
126 formalin fixative (Z-FIX) for 30 min, permeabilized with 0.1 % Triton X-100 for 5 min, blocked  
127 with 1.0 % BSA for 30 min and treated with the mixture of Phalloidin-FITC (0.5 µg/mL) and  
128 Hoechst (5 µg/mL) for 30 min at room temperature. A small drop volume (~ 20 µL) of the  
129 antifade mounting medium (Vectashield, H-1000) was added onto each cell specimen, which  
130 was then covered using cover slips. The cover slips were then fixed onto the slides by nail  
131 polish. After that, the LSCM images of the samples were observed on a LSCM imaging system.

132 *Cell Viability Assay:* The cytotoxicity and therapeutic efficacy of the nanoparticles was  
133 assessed with U-87 MG, or HepG2 cells by using the MTT method. Typically, 100 µL of U-87  
134 MG or HepG2 cells in complete DMEM medium were seeded into each well of a 96-well plate

135 at a concentration of  $5 \times 10^4$  cells/mL and allowed to adhere overnight. The growth medium was  
136 replaced with a fresh one (without FBS) containing various concentrations of free DOX, SA-  
137 FeGdNP@mPEG2, or SA-FeGdNP-DOX2@mPEG2 nanoparticles. Herein, before dispersing  
138 in DMEM medium (without FBS), the SA-FeGdNP@mPEG2, and SA-FeGdNP-  
139 DOX2@mPEG2 nanoparticles were incubated at 37 °C for 24 h at pH 7.4 without GSH, or at  
140 pH 6.8 with 10 mM of GSH. After charging the fresh growth medium without FBS containing  
141 nanoparticles or free DOX, the cells were incubated for 4 h at 37 °C. After that, the growth  
142 medium containing nanoparticles or DOX was replaced with complete DMEM medium. After  
143 further incubation for 44 h, 10  $\mu$ L of MTT (5.0 mg/mL in PBS) was added to each well of the  
144 96-well plate. After an additional 4.0 h of incubation, the growth medium was removed and the  
145 resulted formazan crystals in each well were dissolved with 100  $\mu$ L of dimethyl sulfoxide  
146 (DMSO). The absorbance was recorded at a wavelength of 570 nm using a multi-mode  
147 microplate reader.

148 *Tumor Model:* All animal procedures were performed in accordance with the Guidelines for  
149 Care and Use of Laboratory Animals of Southern Medical University and approved by the  
150 Animal Ethics Committee of Southern Medical University. The U-87 MG tumor-bearing nude  
151 mice were prepared by inoculating U-87 MG cells ( $4 \times 10^6$  cells in 100  $\mu$ L PBS) into the right  
152 shoulder of each mouse (female, 5 weeks) under anesthesia. The tumor size was measured *via*  
153 a caliper at predetermined times. The tumor volume was calculated through  $ab^2/2$ , where a and  
154 b are respectively the length and width of a tumor. The relative tumor volume ( $V/V_0$ ) was the  
155 ratio of tumor volume after treatment (V) to that before treatment ( $V_0$ ).

156 *CC-MRI of tumors:* The U-87 MG tumor-bearing nude mice were anaesthetized by isoflurane  
157 (1.0-2.0%) in oxygen, and placed in an animal-specific body coil for MRI data acquisition.  
158 Mice were kept warm by circulating warm water (37 °C), and were placed in a stretched prone  
159 position with a respiratory sensor during the experiments.  $T_1$ -weighted images were acquired at  
160 pre-injection and post injection (intravenously) of commercial Dotarem<sup>®</sup> ( $C_{Gd} = 5.0$  mg / kg),

161 or SA-FeGdNP-DOX2@mPEG2 nanoparticles ( $C_{Gd} = 5.0$  mg / kg). Multi-slice multi-echo  
162 sequence was employed to acquire images using parameters as follows: repetition time (TR) =  
163 1000 ms, echo time (TE) = 30 ms, flip angle =  $180^\circ$ , matrix size =  $256 \times 256$ , field of view =  
164  $40 \times 40$  mm<sup>2</sup>, slices = 16, slice thickness = 1 mm. MR images were analyzed by measuring  
165 signal intensity with the software Image J. The signal-to-noise ratio (SNR) and SNR ratio (*i.e.*,  
166 signal enhancement) were calculated according to the following equations (1) and (2).

$$167 \text{ SNR} = \text{SI}_{\text{mean}} / \text{SD}_{\text{noise}} \quad (1)$$

$$168 \Delta \text{SNR} = (\text{SNR}_{\text{post}} - \text{SNR}_{\text{pre}}) / \text{SNR}_{\text{pre}} \times 100 \% \quad (2)$$

169 *High-performance chemotherapy:* When the tumor volume was around 150 mm<sup>3</sup>, 100  $\mu$ L of  
170 saline, SA-FeGdNP@mPEG2, free DOX, SA-FeGdNP-DOX2@mPEG2 were injected  
171 intravenously into the mice under anesthesia ( $n = 5/\text{group}$ ). The DOX dosage was 5 mg/kg or  
172 10 mg/kg. After injection, dimensions of the tumors and body weights of the mice were  
173 monitored every other day.

174 *Statistical analysis:* Statistical significance was determined by applying Student's *t*-test or  
175 by a one-way ANOVA followed by Student-Newman-Keuls test using Sigma Stat version 3.5.  
176 The significance level was fixed as  $P < 0.05$ .

177

178 **Table S1.** Synthesis conditions and characterization results of SA-FeGdNP@mPEG.

| Sample Nomenclature | FeGdNP <sup>a)</sup><br>(mL) | mPEG-FBA-CA <sup>b)</sup><br>(mL) | mPEG-FBA-CA/Gd<br>Mass Ratio <sup>c)</sup> | EDC<br>( $\mu$ L) | DMF<br>(mL) | Gd Recovery <sup>d)</sup><br>(%) |
|---------------------|------------------------------|-----------------------------------|--------------------------------------------|-------------------|-------------|----------------------------------|
| SA-FeGdNP@mPEG1     | 0.5                          | 0.876                             | 8.0                                        | 10                | 3.624       | 83                               |
| SA-FeGdNP@mPEG2     | 0.5                          | 0.438                             | 4.0                                        | 10                | 4.062       | 84                               |
| SA-FeGdNP@mPEG3     | 0.5                          | 0.219                             | 2.0                                        | 10                | 4.281       | 82                               |
| SA-FeGdNP@mPEG4     | 0.5                          | 0.110                             | 1.0                                        | 10                | 4.390       | 78                               |
| SA-FeGdNP@mPEG5     | 0.5                          | 0.055                             | 0.5                                        | 10                | 4.445       | 76                               |

179 <sup>a)</sup> The feeding FeGdNP was dispersed in pure water with 22.2 mM of  $C_{Gd}$  and 45.3 mM of  $C_{Fe}$ .

180 <sup>b)</sup> The concentration of feeding mPEG-FBA-CA is 15.94 mg/mL.

181 <sup>c)</sup> Calculated from the mass ratio of feeding mPEG-FBA-CA to Gd in FeGdNP.

182 <sup>d)</sup> Calculated from the molar ratio of Gd in SA-FeGdNP@mPEG to that in the feeding FeGdNP.

183

184



185 **Table S2.** Synthesis conditions and characterization results of SA-FeGdNP-DOX@mPEG.

| Sample Nomenclature  | FeGdNP <sup>a)</sup> (mL) | mPEG-FBA-CA <sup>b)</sup> (mL) | DOX/Gd Mass Ratio <sup>c)</sup> | DOX (mL) | EDC ( $\mu$ L) | DMF (mL) | DOX Loading Efficiency <sup>d)</sup> (%) | DOX Loading Content <sup>e)</sup> (%) | $r_1$ <sup>f)</sup> ( $\text{mM}^{-1} \text{s}^{-1}$ ) | $r_2$ <sup>f)</sup> ( $\text{mM}^{-1} \text{s}^{-1}$ ) | $r_2/r_1$      |
|----------------------|---------------------------|--------------------------------|---------------------------------|----------|----------------|----------|------------------------------------------|---------------------------------------|--------------------------------------------------------|--------------------------------------------------------|----------------|
| SA-FeGdNP-DOX1@mPEG2 | 0.5                       | 0.438                          | 1.6                             | 2.793    | 10             | 1.269    | 28.8                                     | 21.4                                  | -                                                      | -                                                      | -              |
| SA-FeGdNP-DOX2@mPEG2 | 0.5                       | 0.438                          | 0.8                             | 1.396    | 10             | 2.666    | 55.4                                     | 20.6                                  | 18.37 $\pm$ 0.35                                       | 336.9 $\pm$ 7.5                                        | 18.4 $\pm$ 0.7 |
| SA-FeGdNP-DOX3@mPEG2 | 0.5                       | 0.438                          | 0.4                             | 0.698    | 10             | 3.364    | 71.2                                     | 13.2                                  | 18.82                                                  | 303.3                                                  | 16.1           |
| SA-FeGdNP-DOX4@mPEG2 | 0.5                       | 0.438                          | 0.2                             | 0.349    | 10             | 3.713    | 76.0                                     | 7.1                                   | 18.78                                                  | 280.2                                                  | 14.9           |
| SA-FeGdNP-DOX5@mPEG2 | 0.5                       | 0.438                          | 0.1                             | 0.175    | 10             | 3.887    | 76.5                                     | 3.6                                   | 20.06                                                  | 258.8                                                  | 12.9           |
| FeGdNP               | -                         | -                              | -                               | -        | -              | -        | -                                        | -                                     | 20.32                                                  | 146.9                                                  | 7.2            |

186 <sup>a)</sup> The feeding FeGdNP was dispersed in pure water with 22.2 mM of  $C_{Gd}$  and 45.3 mM of  $C_{Fe}$ .

187 <sup>b)</sup> The concentration of feeding mPEG-FBA-CA is 15.94 mg/mL.

188 <sup>c)</sup> Calculated from the mass ratio of feeding DOX to Gd in FeGdNP.

189 <sup>d)</sup> Calculated from the mass percentage of loaded DOX to the feeding DOX.

190 <sup>e)</sup> Calculated from the mass percentage of loaded DOX to the SA-FeGdNP-DOX@mPEG nanoparticles.

192 <sup>f)</sup> The  $r_1$  and  $r_2$  were measured on a MRI scanner system (7.0 T, Bruker, B-C 70/16 US) (mean  
193  $\pm$  SD,  $n = 3$ ).

194

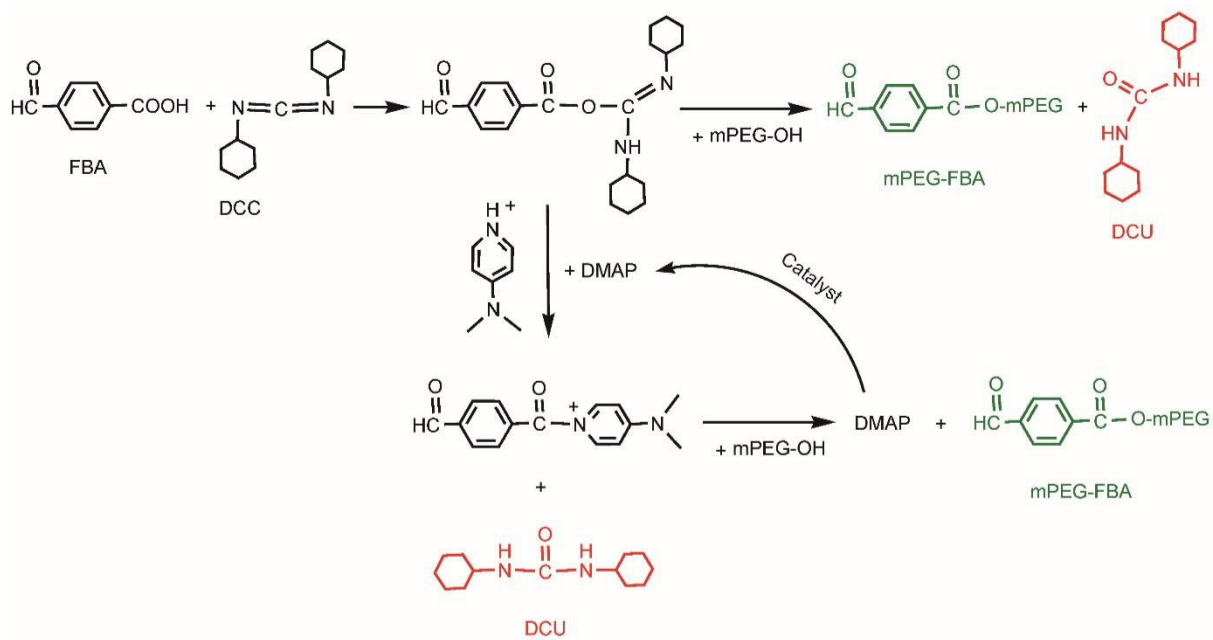

195

196 **Fig. S1.** Schematic illustration for the synthesis of mPEG-FBA.

197

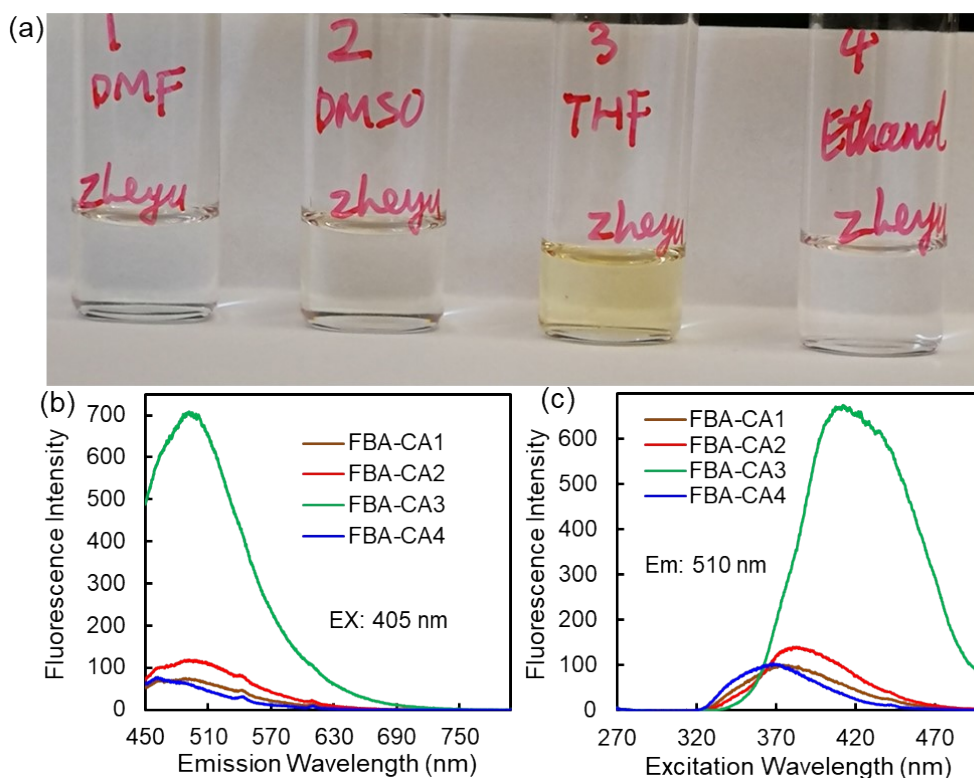

198

199 **Fig. S2.** Influence of formylbenzoic acid (FBA) solvents (DMF, DMSO, THF, and ethanol) on  
 200 the reaction between FBA and cystamine dihydrochloride (CA) in the presence of triethylamine  
 201 (TEA). CA solvent is methanol. Reaction temperature: 37 °C. Reaction time: 72 h. (a): Photo  
 202 of the resulting FBA-CA1-4 solutions reacted in DMF, DMSO, THF, or ethanol. Yellow color  
 203 of FBA-CA3 solution indicates much higher recovery in THF than other solvents. (b, c):  
 204 Fluorescence spectra of the auto-fluorescent FBA-CA1-4. (b): Emission curves at the excitation  
 205 of 405 nm. (c): Excitation curves at the emission of 510 nm. The maximum excitation, and  
 206 emission of FBA-CA3 is respectively measured to be 412, and 492 nm.

207

208

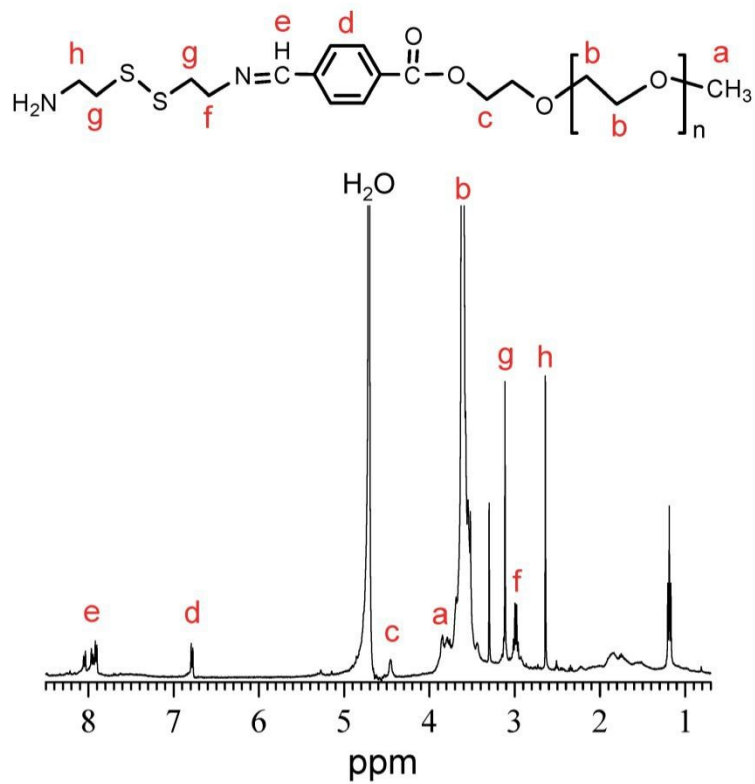

209

210 **Fig. S3.** The <sup>1</sup>H NMR spectrum of mPEG-FBA-CA.

211

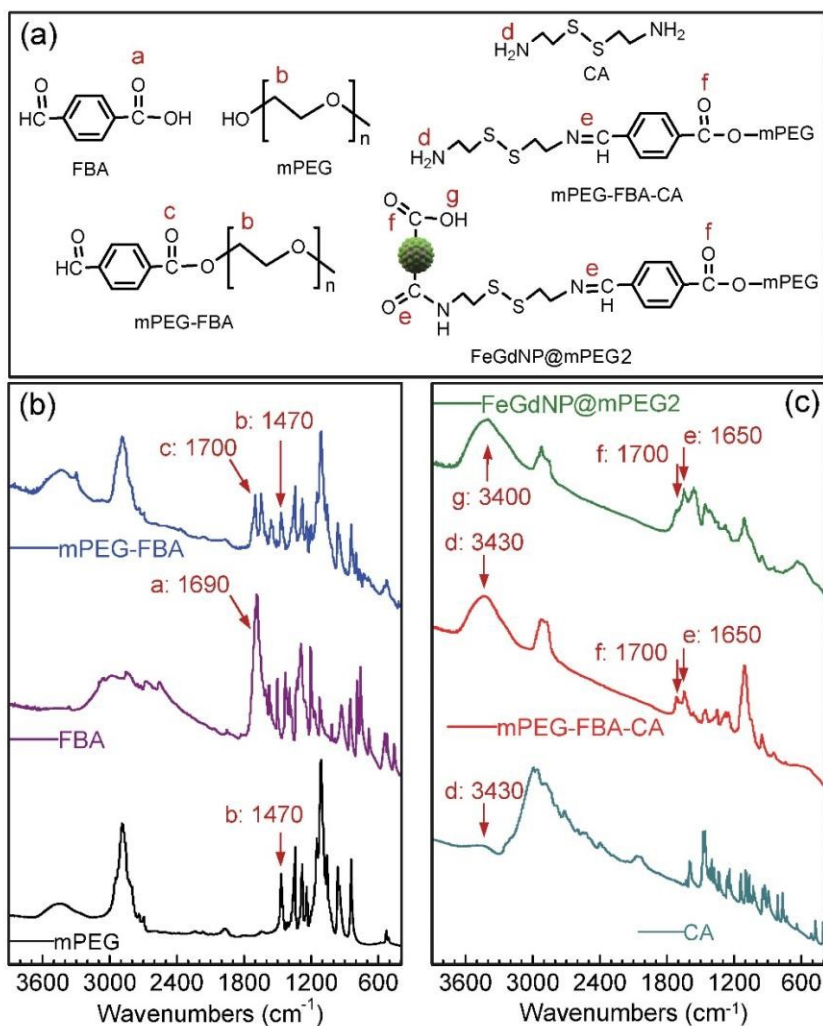

212

213 **Fig. S4.** (a): Molecular structures of the compounds. (b): FT-IR spectra of mPEG, FBA, and

214 mPEG-FBA. (c): FT-IR spectra of CA, mPEG-FBA-CA, and FeGdNP@mPEG2. FBA has a

215 characteristic peak at 1690 cm<sup>-1</sup> (C=O stretching vibration in carboxyl group). mPEG has a

216 characteristic peak at 1470 cm<sup>-1</sup> (C-H stretching vibration in methylene). Both the characteristic

217 peak at 1700 cm<sup>-1</sup> (C=O stretching vibration in ester) and that at 1470 cm<sup>-1</sup> demonstrate the

218 successful synthesis of mPEG-FBA. In addition, CA has a characteristic peak at 3430 cm<sup>-1</sup>

219 (N-H stretching vibration in primary amine). Both the characteristic peak at 3430 cm<sup>-1</sup> and that

220 at 1650 cm<sup>-1</sup> (C=N stretching vibration) demonstrate the successful formation of mPEG-FBA-

221 CA. The peaks at 1650 cm<sup>-1</sup> (C=N stretching vibration) and 3400 cm<sup>-1</sup> (O-H stretching vibration

222 in carboxyl group) indicate the conjugation of mPEG-FBA-CA on the surface of FeGdNP

223 generating FeGdNP@mPEG2.

224

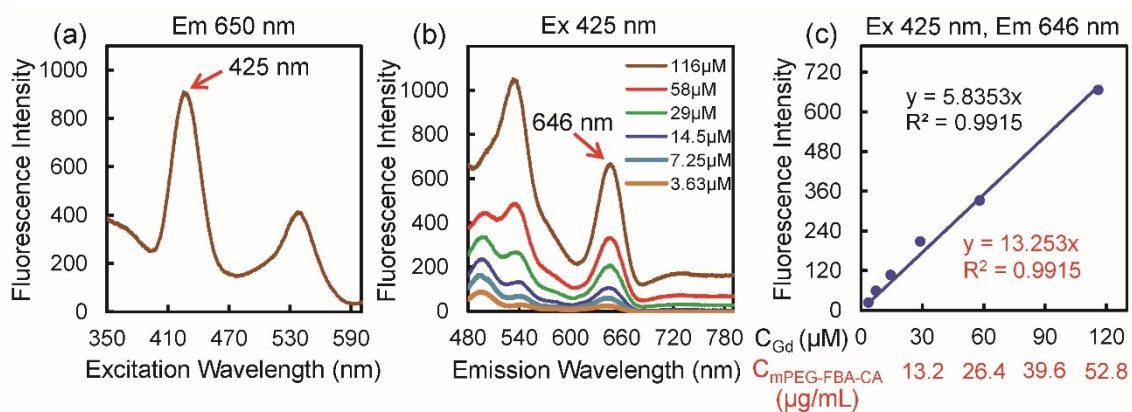

225

226 **Fig. S5.** Fluorescence spectra and standard curve of SA-FeGdNP@mPEG2 nanoparticles. (a):

227 Fluorescence spectrum of SA-FeGdNP@mPEG2 ( $E_m = 650$  nm). (b): Fluorescence spectra of

228 SA-FeGdNP@mPEG2 ( $E_x = 425$  nm) with various Gd concentrations from 3.63 to 116  $\mu M$ .

229 (c): Plot of fluorescence intensity at 646 nm ( $E_x = 425$  nm) as a function of  $C_{Gd}$  ( $\mu M$ ) or  $C_{mPEG-}$

230  $FBA-CA$  ( $\mu g/mL$ ).

231

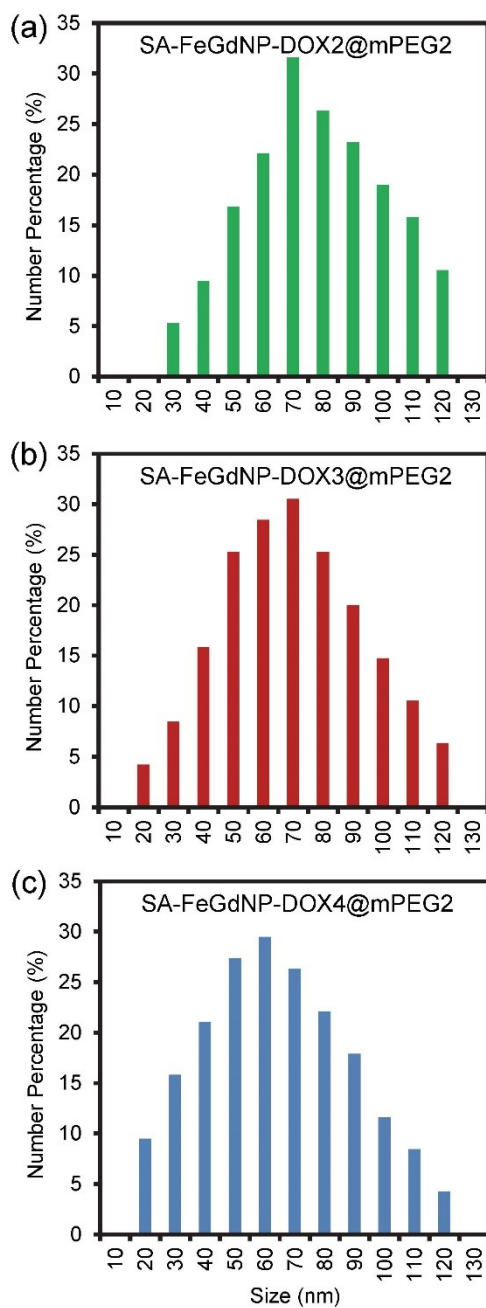

232

233 **Fig. S6.** Size distribution of SA-FeGdNP-DOX2-4@mPEG2 measured from the TEM images.

234 The average particle sizes were respectively measured to be 77.8, 71.3, and 66.6 for SA-

235 FeGdNP-DOX2-4@mPEG2.

236

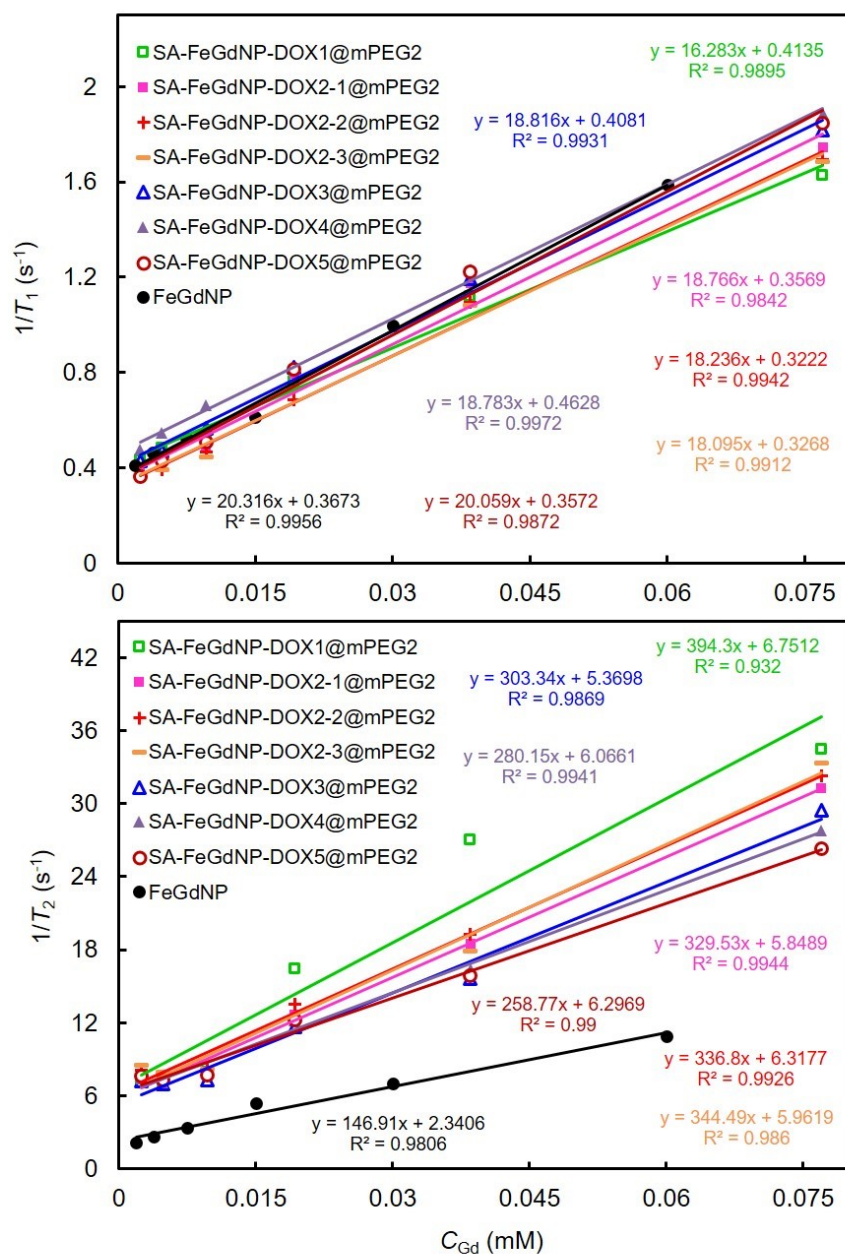

237

238 **Fig. S7.**  $T_1$  relaxation rate ( $1/T_1$ ) (a) or  $T_2$  relaxation rate ( $1/T_2$ ) (b) plotted as a function of  $C_{Gd}$

239 for SA-FeGdNP-DOX1-5@mPEG2. For  $T_1$  relaxation rates: TE = 10 ms, TR = 100 ~ 4000 ms.

240 For  $T_2$  relaxation rates: TR = 2000 ms, TE = 10 ~ 160 ms. SA-FeGdNP-DOX2-1@mPEG2, SA-

241 FeGdNP-DOX2-2@mPEG2, and SA-FeGdNP-DOX2-3@mPEG2 were synthesized from 3

242 different batches at same conditions. There is no linear relationship between  $1/T_2$  and  $C_{Gd}$  for

243 SA-FeGdNP-DOX1@mPEG2 ( $R^2 = 0.932$ ) because 1.6 of DOX/Gd mass ratio is too high

244 resulting in unstable aggregates.

245



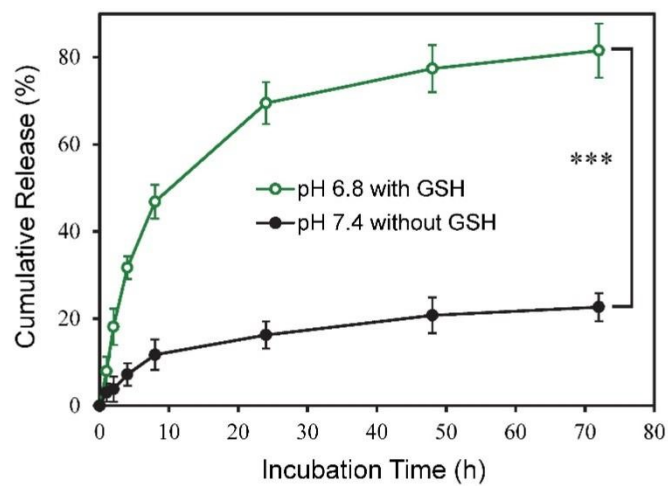

246

247 **Fig. S8.** Release behaviors of DOX from SA-FeGdNP-DOX2@mPEG2 nanoparticles at pH

248 7.4 without GSH or at pH 6.8 with 10 mM of GSH. \*\*\* P < 0.001.

249

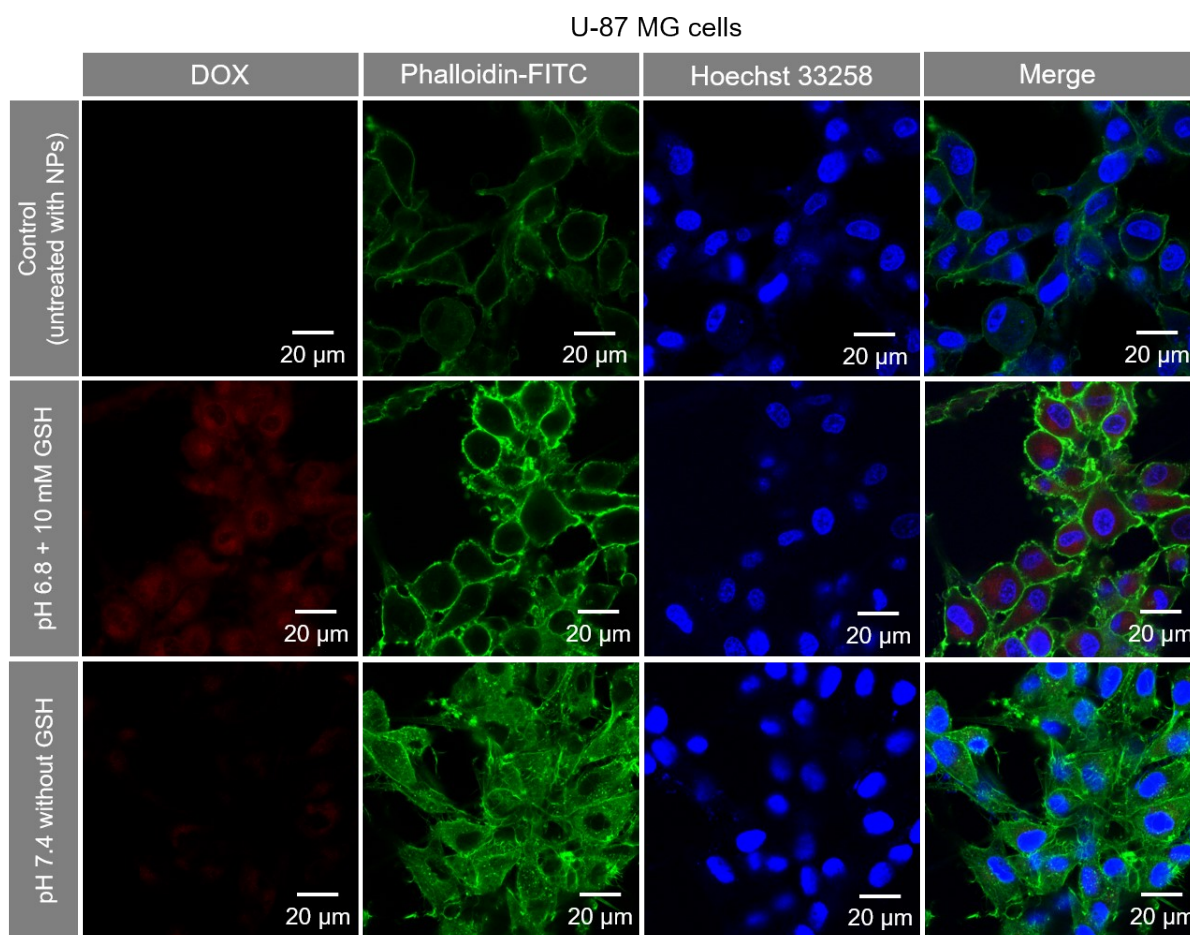

250

251 **Fig. S9.** LSCM images of U-87 MG cells incubated with SA-FeGdNP-DOX2@mPEG2  
 252 nanoparticles. Before incubation with cells, the nanoparticles were incubated at 37 °C for 24 h  
 253 at pH 6.8 with 10 mM of GSH, or at pH 7.4 without GSH. The cells untreated with nanoparticles  
 254 are used as the control. DOX is red. The cytoskeleton stained with phalloidin-FITC is green.  
 255 The nucleus stained with Hoechst 33258 is blue.

256

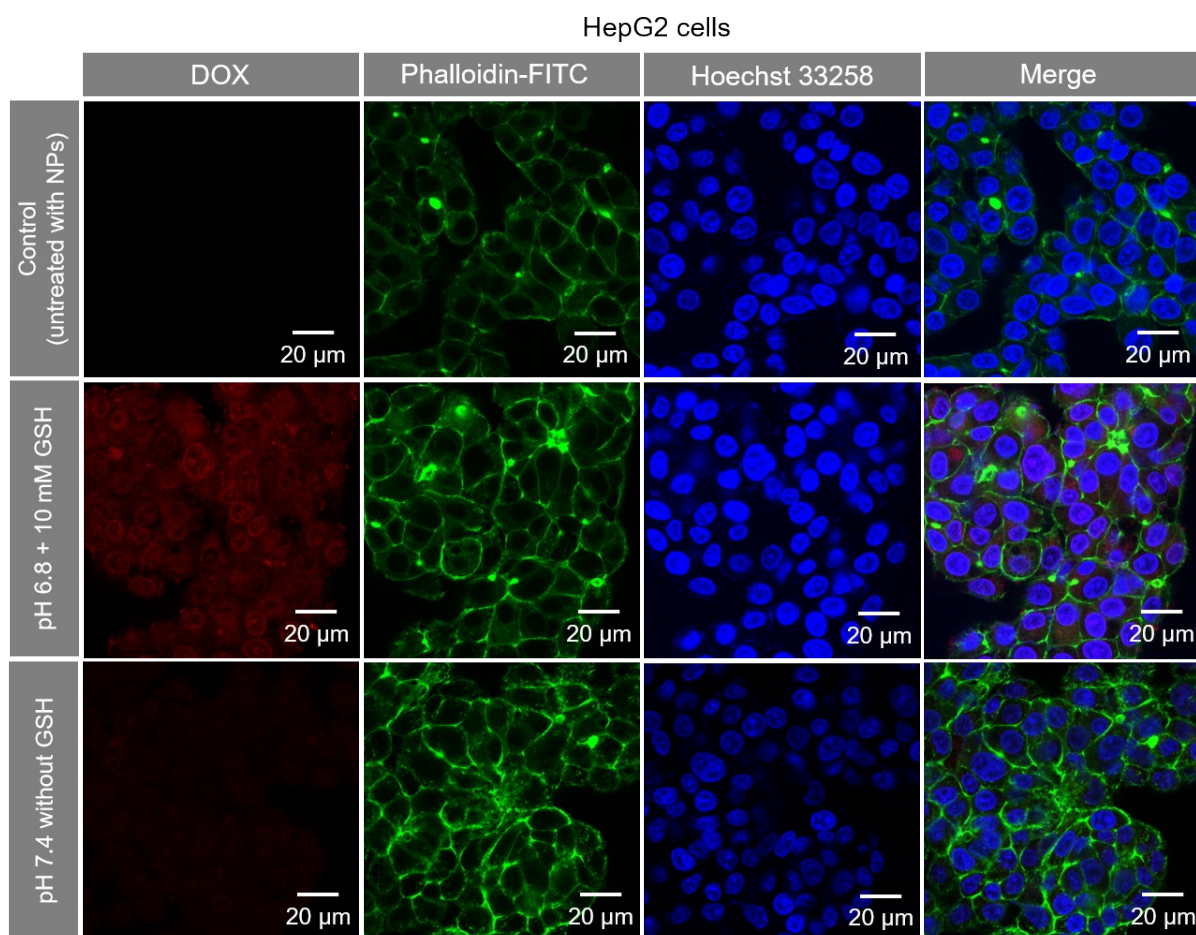

257

258 **Fig. S10.** LSCM images of HepG2 cells incubated with SA-FeGdNP-DOX2@mPEG2  
 259 nanoparticles. Before incubation with cells, the nanoparticles were incubated at 37 °C for 24 h  
 260 at pH 6.8 with 10 mM of GSH, or at pH 7.4 without GSH. The cells untreated with nanoparticles  
 261 are used as the control. DOX is red. The cytoskeleton stained with phalloidin-FITC is green.  
 262 The nucleus stained with Hoechst 33258 is blue.

263

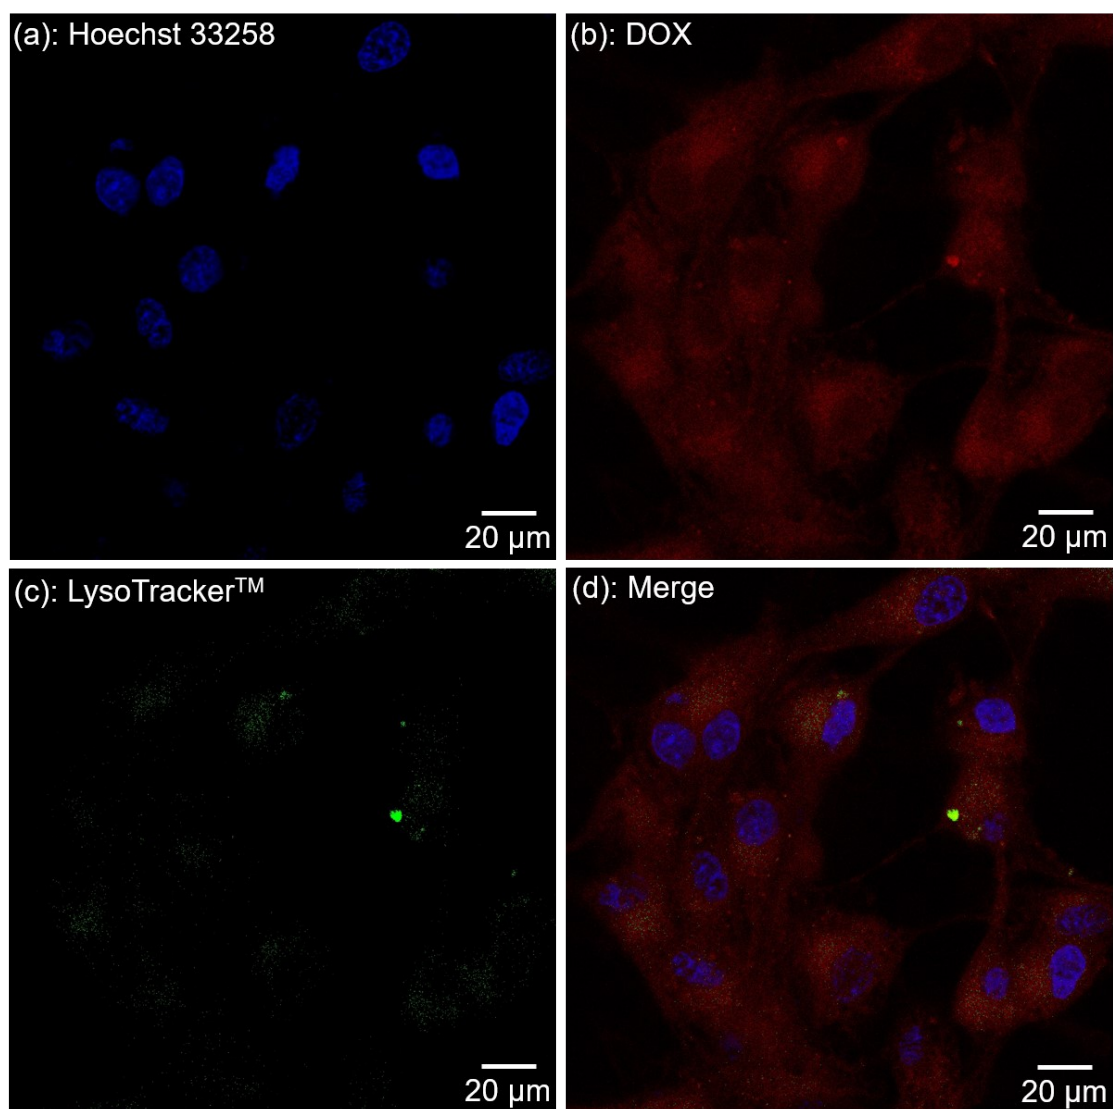

264

265 **Fig. S11.** LSCM images of U-87 MG cells incubated with SA-FeGdNP-DOX2@mPEG2  
 266 nanoparticles. Before incubation with cells, the nanoparticles were incubated at 37 °C for 24 h  
 267 at pH 6.8 with 10 mM of GSH. The nucleus stained with Hoechst 33258 is blue (a, d). The  
 268 DOX is red (b, d). The endosome and lysosome stained with LysoTracker™ is green (c, d). The  
 269 red signal overlaps with green and blue, which demonstrates that the nanoparticles were  
 270 internalized into endosomes *via* endocytosis mechanism, and some of them escaped from the  
 271 endosome and lysosome and entered into the nucleus.

272

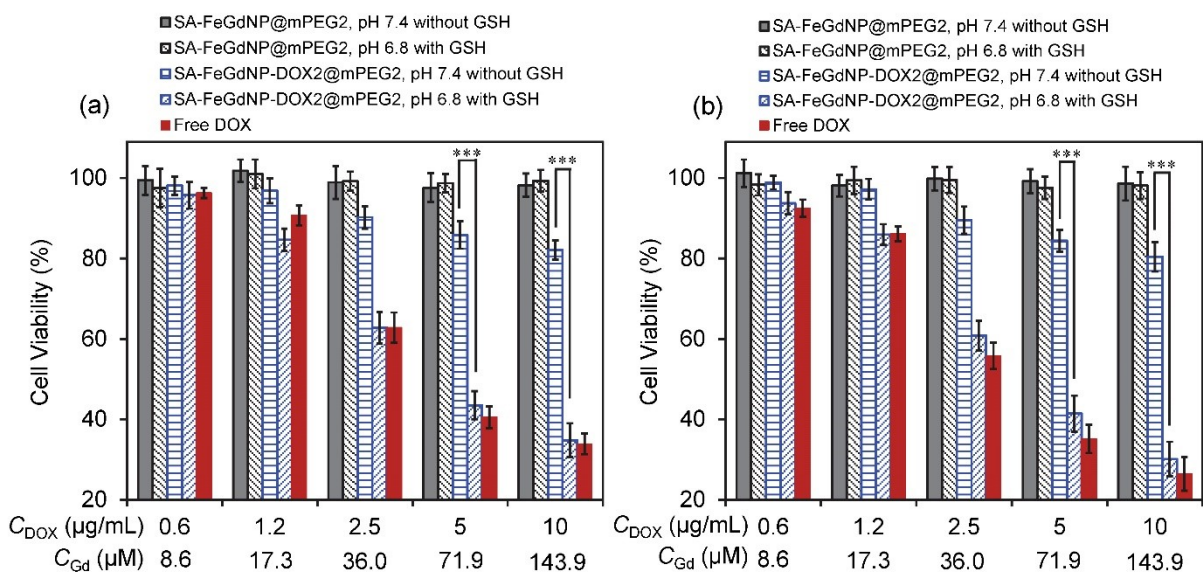

273

274 **Fig. S12.** Cell viabilities of SA-FeGdNP@mPEG2 nanoparticles, SA-FeGdNP-  
 275 DOX2@mPEG2 nanoparticles, or free DOX on U-87 MG cells (a), or HepG2 cells (b). Before  
 276 incubation with cells, the nanoparticles were incubated at 37 °C for 24 h at pH 7.4 without GSH,  
 277 or at pH 6.8 with 10 mM of GSH. The incubation time of the nanoparticles or free DOX with  
 278 cells was 48 h. \*\*\*P < 0.001.

279

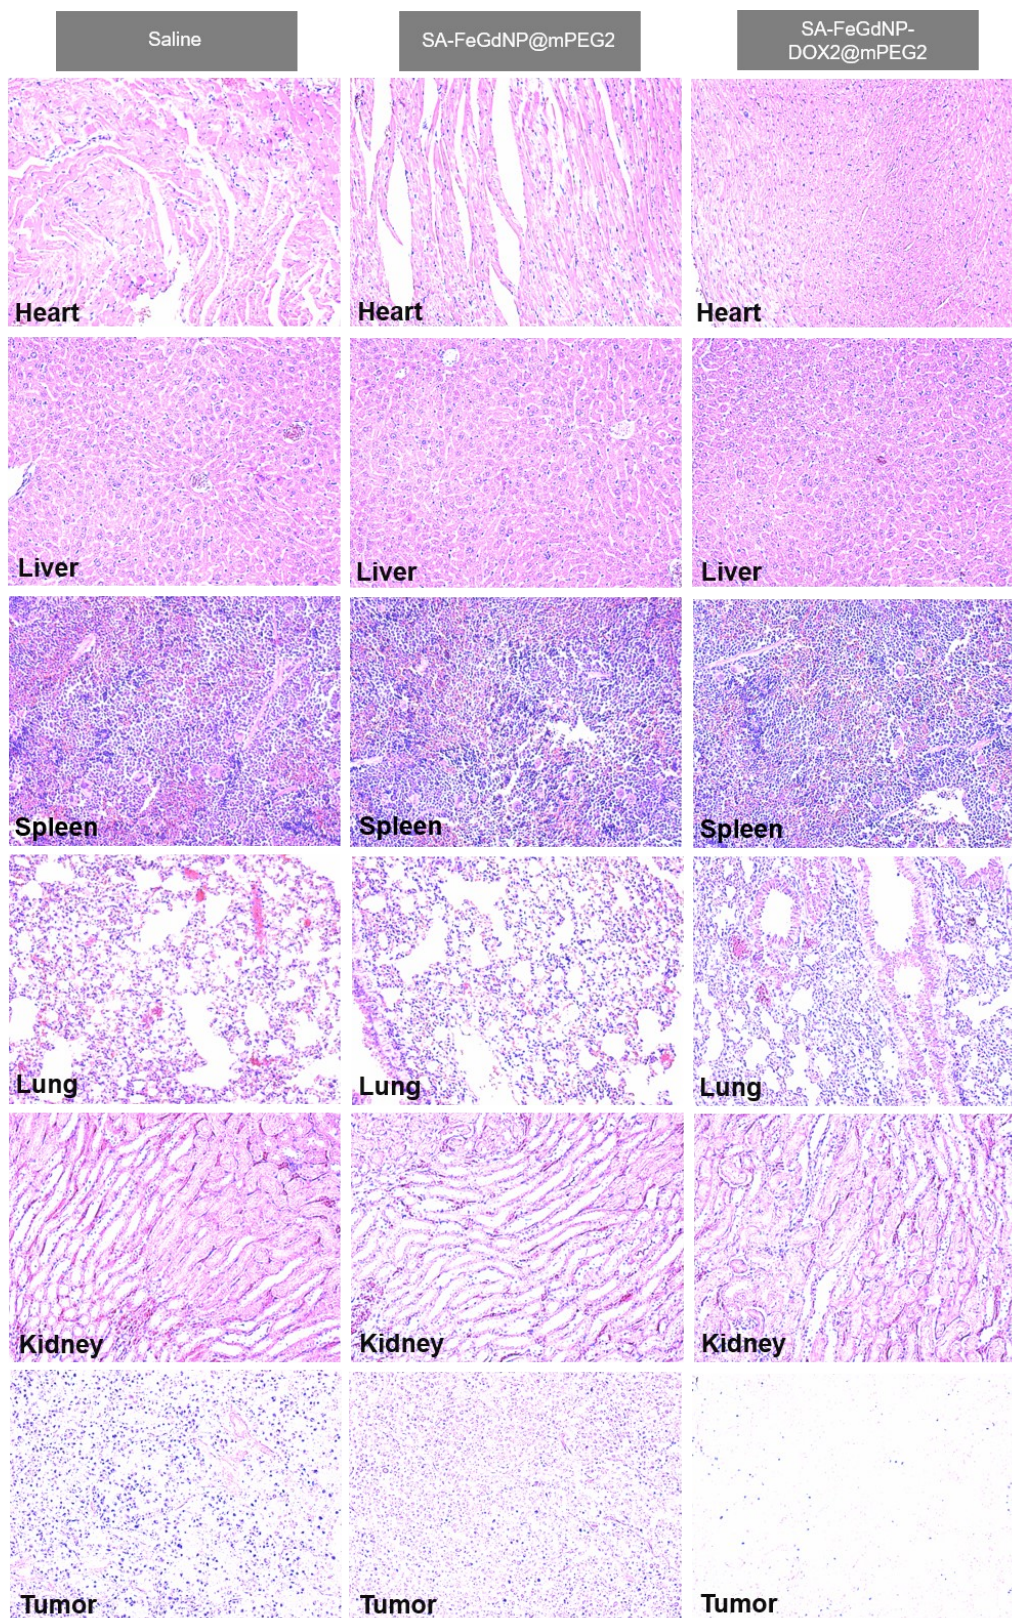

280

281 **Fig. S13.** Histological analyses (H&E staining) of main organs and tumors from the  
 282 subcutaneous U-87 MG tumor-bearing nude mice at day 2 post-injection of saline, SA-  
 283 FeGdNP@mPEG2 or SA-FeGdNP-DOX2@mPEG2 nanoparticle.
